# Supplementary material
Source: PubMed Central journal article supplement (PMC3281703)
Supplement: supp_M111.300194_ianculescu_supplementary_information_with_code.pdf [file supp_M111.300194_ianculescu_supplementary_information_with_code.pdf]

Selective Roles for CBP and p300 as Coregulators for Androgen-Regulated Gene Expression in  
Advanced Prostate Cancer Cells\*

**Irina Ianculescu<sup>1</sup>, Dai-Ying Wu<sup>1</sup>, Kimberly Siegmund<sup>2</sup>, and Michael R. Stallcup<sup>1</sup>**

From the <sup>1</sup>Department of Biochemistry and Molecular Biology and <sup>2</sup>Department of Preventive Medicine, Norris Comprehensive Cancer Center, University of Southern California, Los Angeles CA 90089-9176

**SUPPLEMENTARY INFORMATION**

**SUPPLEMENTARY TABLE 1. qRT-PCR mRNA and pre-mRNA primer sequences**

| <b>Primer Name</b>      | <b>Sequence 5' to 3'</b> |
|-------------------------|--------------------------|
| p300_mRNA_F             | TACCCAGTCATCTCCGGCTCCA   |
| p300_mRNA_R             | AAAGATCCATGGGGCTCTTC     |
| CBP_mRNA_F              | GACGACCCTTCACAGCCCCAG    |
| CBP_mRNA_R              | TTCAAGCAGTTGTCGCACAC     |
| 18S_F                   | GAGGATGAGGTGGAACGTGT     |
| 18S_R                   | TCTTCAGTCGCTCCAGGTCT     |
| PSA_F premRNA (1)       | GTTTTTGCCTGGCCCGTAG      |
| PSA_F mature mRNA (1)   | GGCAGCATTGAACCAGAGGAG    |
| PSA reverse mRNA (1)    | GCATGAACTTGGTCACCTTCTG   |
| KLK2 F (1)              | GCTGCCCATTCCTAAAGAAG     |
| KLK2 R (1)              | TGGGAAGCTGTGGCTGACA      |
| TMPRSS2 Forward         | CCTGCAAGGACATGGGCTATA    |
| TMPRSS2 Reverse         | CCGGCACTTGTGTTTCAGTTTC   |
| TMPRSS2 Forward premRNA | TTCAACTGTTTAGGGGTCACCACC |
| TMPRSS2 Reverse premRNA | CGGATGCACCTCGTAGACAGTG   |
| FKBP5 Forward (2)       | AGGCTGCAAGACTGCAGATC     |
| FKBP5 Reverse (2)       | CTTGCCCATTGCTTTATTGG     |
| FKBP5 premRNA For       | AGCCACTGTTGCTGAGCAGG     |
| FKBP5 premRNA Rev       | ACATTATCCACCCCAGCCCC     |

**SUPPLEMENTARY TABLE 2. ChIP primer sequences**

| <b>Primer Name</b>                | <b>Sequence 5' to 3'</b>  |
|-----------------------------------|---------------------------|
| TMPRSS2 14kb ARE V + (3)          | TGGTCCTGGATGATAAAAAAAGTTT |
| TMPRSS2 14kb ARE V - (3)          | GACATACGCCCCACAACAGA      |
| TMPRSS2 promoter (-0.1kb) Forward | CTACAGGAGCTCGTGAGGTAGCA   |
| TMPRSS2 promoter (-0.1kb) Reverse | AGGAAGGGGATTCTGGGGAG      |
| TMPRSS2 TSS +363 forward          | CTGCGAGTCCCTAGCCAGTT      |
| TMPRSS2 TSS +485 reverse          | CTCCCCAAAGAGAAAAGGCG      |
| FKBP5 TSS forward (4)             | CTTTTGGGGGCGGACTGAC       |
| FKBP5 TSS reverse (4)             | CAGGACCCGCCTTCCATAG       |

FKBP5 ARE VIII/IX forward  
FKBP5 ARE VIII/IX reverse

GCATGGTTTAGGGGTTCTTGC  
AACACCCTGTTCTGAATGTGGC

**Please see attached Excel File for the following tables:**

**SUPPLEMENTARY TABLE 3. Genes Significantly Regulated by DHT**

The table list all genes for which expression was significantly ( $q\text{-value} \leq 0.05$ ) different for siNS DHT versus siNS vehicle treated samples. Column E represents  $\log_2$  fold change in expression.

**SUPPLEMENTARY TABLE 4. Genes Affected Significantly by p300 Depletion**

The table list all genes for which expression was significantly ( $q\text{-value} \leq 0.05$ ) different for sip300 DHT versus siNS DHT treated samples. Column E represents  $\log_2$  fold change in expression. Column G indicates whether the gene was also found (TRUE) in Supplementary Table 3, hormone regulated genes.

**SUPPLEMENTARY TABLE 5. Genes Affected Significantly by CBP Depletion**

The table list all genes for which expression was significantly ( $q\text{-value} \leq 0.1$ ) different for siCBP DHT versus siNS DHT treated samples. Column E represents  $\log_2$  fold change in expression. Column G indicates whether the gene was also found (TRUE) in Supplementary Table 3, hormone regulated genes.

**SUPPLEMENTARY REFERENCES**

1. Jia, L., Kim, J., Shen, H., Clark, P. E., Tilley, W. D., and Coetzee, G. A. (2003) *Mol Cancer Res* **1**, 385-392
2. Bolton, E. C., So, A. Y., Chaivorapol, C., Haqq, C. M., Li, H., and Yamamoto, K. R. (2007) *Genes Dev* **21**, 2005-2017
3. Wang, Q., Li, W., Liu, X. S., Carroll, J. S., Janne, O. A., Keeton, E. K., Chinnaiyan, A. M., Pienta, K. J., and Brown, M. (2007) *Mol Cell* **27**, 380-392
4. Makkonen, H., Kauhanen, M., Paakinaho, V., Jaaskelainen, T., and Palvimo, J. J. (2009) *Nucleic Acids Res*

# Code for *Selective roles for CBP and p300 as coregulators for androgen-regulated gene expression in advanced prostate cancer cells.*

Dai-Ying Wu

January 23, 2012

## 1 Preface

In the interests of reproducible research (<http://reproducibleresearch.net>) I have included the code I used to process the data and get the results for this paper.

We ran 24 samples on 2 Illumina HT12v4 microarrays at The Southern California Genotyping Consortium. These samples were processed at the facility with default outlier removal and did not include TIFF images. The resulting data files (idats) were read into Genome Studio and exported without normalization or background correction using the export 'standard probe profile' and export 'control probe profile' feature using the default number of significant digits. Standard error and number of probes were also included in the export (but not used) as were 9 probes with some imputed values (not significant in comparisons of interest).

These two probe files, which can be reconstructed from the 'raw' data on GEO, are the bead summerized datasets that are used for further analysis in R/bioconductor.

## 2 Read in and Quality Check

Read in bead summerized probes and target file, target file can be extracted from GEO data but I have also included it at the end of this document.

```
> library(limma)
> library(qvalue)
> #x is eset that holds raw values
> #y is eset that holds log2 transformed normalized values
> #z is eset that holds batch corrected values
> x = read.ilmn(files="irina-spp.txt", ctrlfiles="irina-cpp.txt")

Reading file irina-spp.txt ... ..
Reading file irina-cpp.txt ... ..

> targets = read.table("sample description.txt", header=T, row.names=1)
> targets = cbind(targets, Type=paste(targets[,1], targets[,2], sep="_"))
> x$targets = targets = targets[x$targets$SampleNames,]
```

### 2.1 Raw expression boxplots + MDS clustering

```
> boxplot(log2(x$E[x$genes$Status=="regular",]),range=0,
+ xlab="Arrays",ylab="log2 intensities", main="Regular probes")

> boxplot(log2(x$E[x$genes$Status=="NEGATIVE",]),range=0,
+ xlab="Arrays",ylab="log2 intensities", main="Control probes")
```

### Regular probes

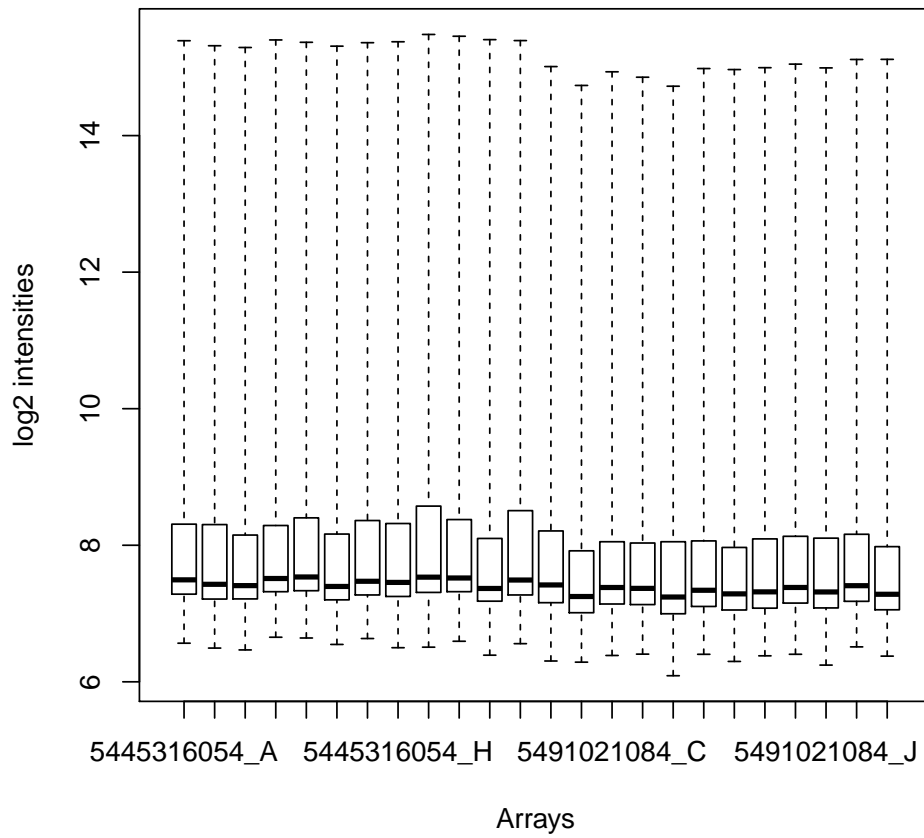

Figure 1: Boxplot of raw expression intensity of regular probes

### Control probes

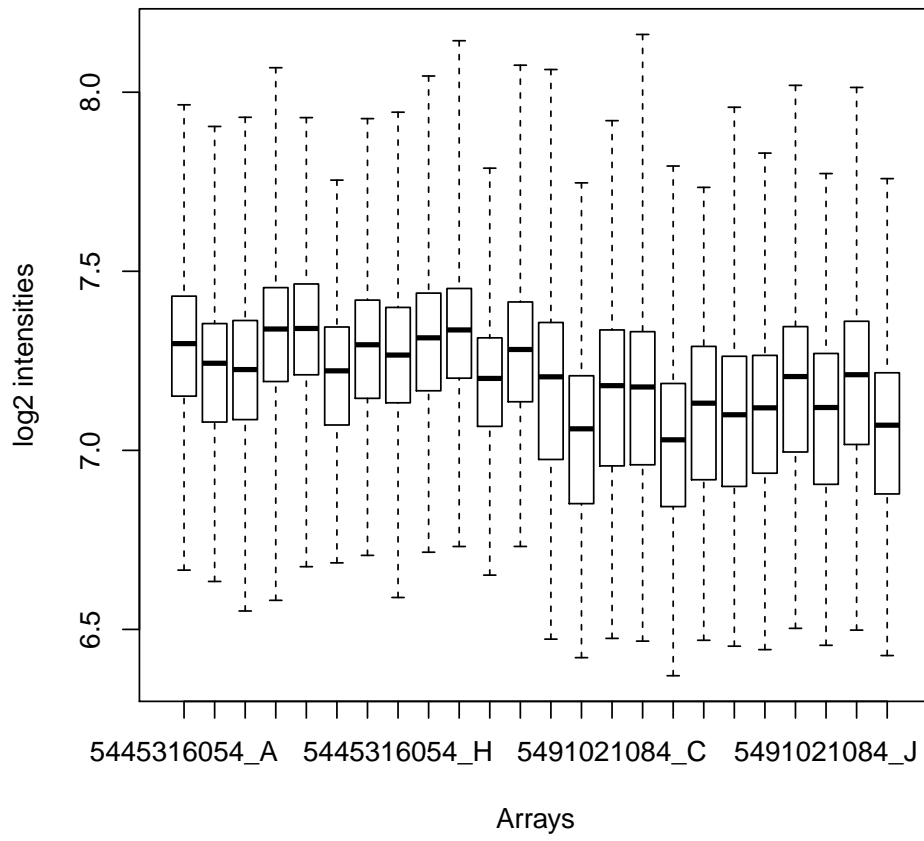

Figure 2: Boxplot of raw expression intensity of control probes

```

> y = neqc(x) #log2 transform + normalize
> plotMDS(y, labels=paste(targets[,1], targets[,2], unclass(targets[,3]), sep="_"),
+ col=unclass(x$targets$Type), xlim = c(-1.5,1.5), ylim=c(-1,1)) #color by type

```

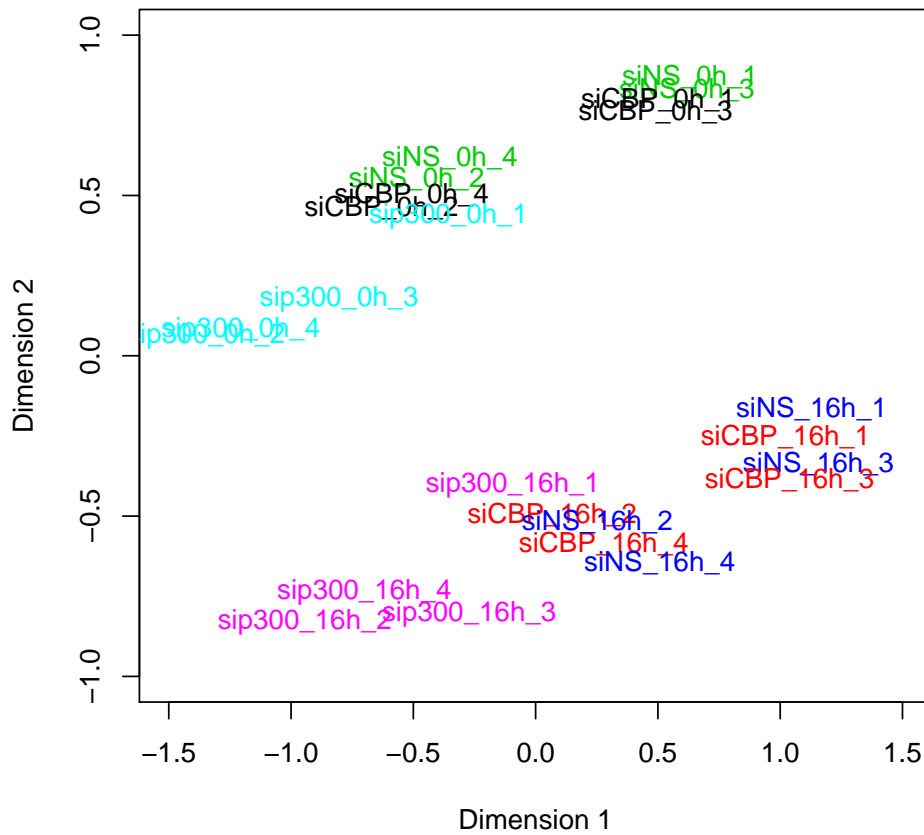

Figure 3: MDS plot of normalized arrays colored by experiment

```

> plotMDS(y,labels=paste(targets[,1], targets[,2], unclass(targets[,3]), sep="_"),
+ col=unclass(x$targets$batch),xlim = c(-1.5,1.5), ylim=c(-1,1)) #color by batch

```

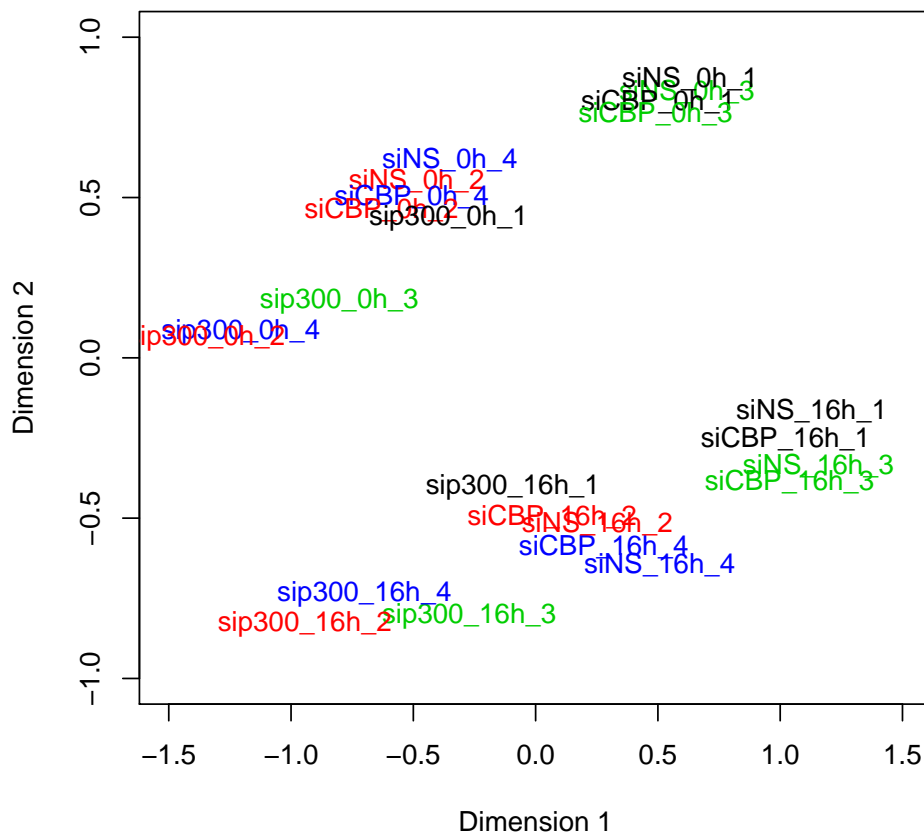

Figure 4: MDS plot of normalized arrays colored by batch

From the above plots, there might be some batch effects that keep the CBP and NS groups together (1+3, 2+4) `Combat.R` is run to remove these effects

```
> source("../ComBat_mod.R") #slightly modified to accept different input
> cb_targets = cbind("Array_Name"=colnames(y$E),
+ "Sample_Name"=as.character(y$targets$Type), "Batch"=unclass(y$targets$batch))
> cb_adj = ComBat_mod(y$E, cb_targets, write=F, skip=1) #takes a while
```

```
Reading Sample Information File
Reading Expression Data File
Found 4 batches
Found 0 covariate(s)
Standardizing Data across genes
Fitting L/S model and finding priors
Finding parametric adjustments
Adjusting the Data
```

```
> colnames(cb_adj) = colnames(y$E) #combat chops up 1st col name
> z = y
> z$E = cb_adj
```

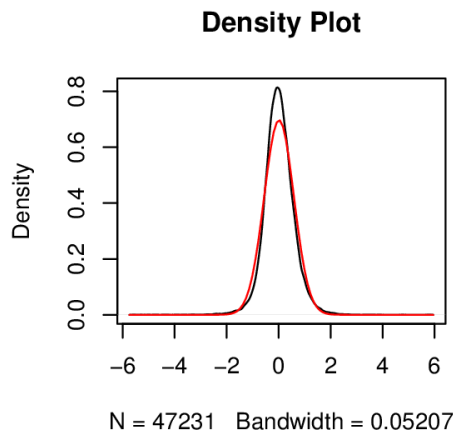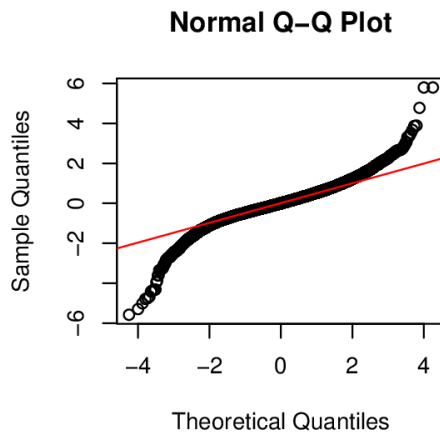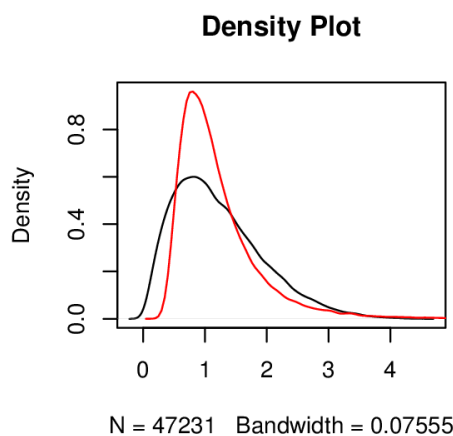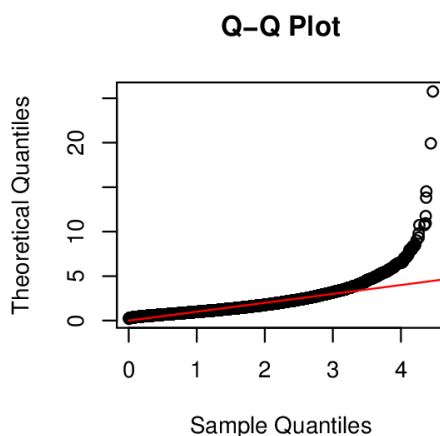



```

> plotMDS(z, labels=paste(targets[,1], targets[,2], unclass(targets[,3]), sep="_"),
+ col=unclass(x$targets$Type), xlim = c(-1.5,1.5), ylim=c(-1,1)) #color by type

```

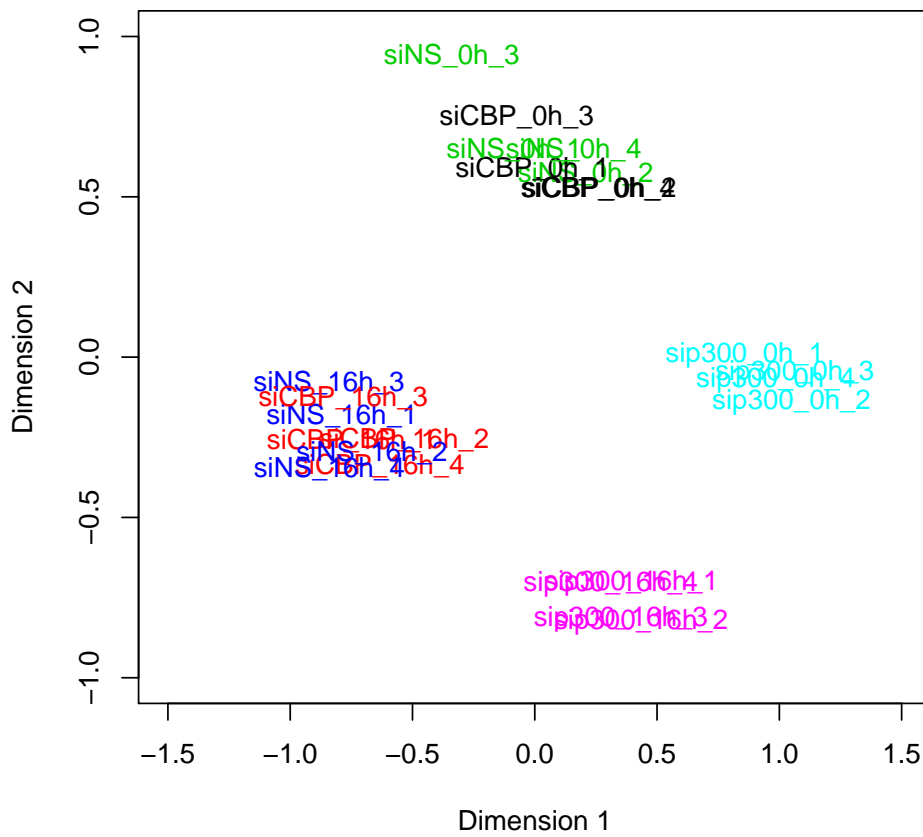

Figure 5: MDS plot of normalized, batch corrected arrays colored by experiment

### 3 Identify differentially regulated genes

Use eBayes from limma package to find CBP regulated genes, p300 regulated genes and DHT-regulated genes. (see paper for details)

#### 3.1 CBP regulated

```
> sel = z$targets[,1] != "sip300" & z$targets[,2] == "16h" #cbp regulated
> lumisub = z$E[,sel]
> pd = z$targets[colnames(lumisub),] #phenotype data
> des = matrix(0, ncol(lumisub), length(levels(factor(pd$treat))))
> for(i in 1:length(levels(factor(pd$Type)))){
+ des[pd$Type==levels(factor(pd$Type))[i],i]=1
+ }
> colnames(des) = levels(factor(pd$treat))
> des

      siCBP siNS
[1,]      1     0
[2,]      0     1
[3,]      0     1
[4,]      1     0
[5,]      1     0
[6,]      0     1
[7,]      1     0
[8,]      0     1

> cm = rbind(1,-1) #assume col2 is NS
> if(!grepl(colnames(des)[2], "siNS")) { cm = -cm }
> cm

      [,1]
[1,]      1
[2,]     -1

> fit = lmFit(lumisub,des)
> fit2 = contrasts.fit(fit,cm)
> efit = eBayes(fit2)
> cbp_efit = efit
> cbp_efit$qv = qvalue(efit$p.value)$qvalues
> sig_fdr = which(cbp_efit$qv<0.1)
> sig16cbp = rownames(efit[sig_fdr,][order(efit$p.value[sig_fdr]),]) #illumina IDs
> length(sig16cbp) #7

[1] 7

> z$genes[match(sig16cbp, z$genes[,1]), 2]

[1] "CREBBP" "SERPINE2" "MAPK9" "ANXA9" "C19orf4" "SC01" "TMEM20"
```

#### 3.2 p300 regulated

```
> sel = z$targets[,1] != "siCBP" & z$targets[,2] == "16h" #p300 regulated
> lumisub = z$E[,sel]
> pd = z$targets[colnames(lumisub),]
```

```

> des = matrix(0, ncol(lumisub), length(levels(factor(pd$treat))))
> for(i in 1:length(levels(factor(pd$Type)))){
+ des[pd$Type==levels(factor(pd$Type))[i],i]=1
+ }
> colnames(des) = levels(factor(pd$treat))
> des

      siNS sip300
[1,]    1     0
[2,]    0     1
[3,]    1     0
[4,]    0     1
[5,]    0     1
[6,]    1     0
[7,]    0     1
[8,]    1     0

> cm = rbind(1,-1) #assume col2 is NS
> if(!grepl(colnames(des)[2], "siNS")) { cm = -cm }
> cm

      [,1]
[1,]   -1
[2,]    1

> fit = lmFit(lumisub,des)
> fit2 = contrasts.fit(fit,cm)
> efit = eBayes(fit2)
> p300_efit = efit
> p300_efit$qv = qvalue(efit$p.value)$qvalues
> sig_fdr = which(p300_efit$qv<0.05)
> sig16p300 = rownames(efit[sig_fdr,][order(efit$p.value[sig_fdr]),])
> length(sig16p300) #4582

[1] 4582

> head(z$genes[match(sig16p300, z$genes[,1]), 2])

[1] "PCDHB2" "NTNG1" "PHLDA2" "CAB39L" "CAB39L" "CBR3"

```

### 3.3 DHT regulated

```

> sel = z$targets[,1] == "siNS" #hormone regulated
> lumisub = z$E[,sel]
> pd = z$targets[colnames(lumisub),]
> des = matrix(0, ncol(lumisub), length(levels(factor(pd$hour))))
> for(i in 1:length(levels(factor(pd$Type)))){
+ des[pd$Type==levels(factor(pd$Type))[i],i]=1
+ }
> colnames(des) = levels(factor(pd$hour))
> des

      Oh 16h
[1,]    1    0
[2,]    1    0

```

```

[3,] 0 1
[4,] 0 1
[5,] 0 1
[6,] 1 0
[7,] 0 1
[8,] 1 0

> cm = rbind(1,-1)
> fit = lmFit(lumisub,des)
> fit2 = contrasts.fit(fit,cm)
> efit = eBayes(fit2)
> hr_efit = efit
> hr_efit$qv = qvalue(efit$p.value)$qvalues
> sig_fdr = which(hr_efit$qv<0.05)
> hor_reg = rownames(efit[sig_fdr,][order(efit$p.value[sig_fdr]),])
> length(hor_reg) #676

[1] 676

> head(z$genes[match(hor_reg, z$genes[,1]), 2])

[1] "KLK2" "RHO" "SNAI2" "ACSL3" "MICAL1" "SGK1"

> table(efit[sig_fdr,]$coefficients>0) #up and down regulated genes

FALSE TRUE
 416 260

> table(is.element(hor_reg, sig16p300)) #DHT regulated AND p300 regulated

FALSE TRUE
 357 319

```

## 4 Output

### 4.1 GEO spreadsheet

GEO output for Illumina expression excel template

```

> out = matrix(0, ncol=ncol(z$E)*2, nrow=nrow(z$E))
> colnames(out) = as.character(1:(ncol(z$E)*2))
> for(i in 1:ncol(z$E)) {
+   out[, (2*(i-1)+1)] = z$E[,i]
+   out[, (2*(i-1)+2)] = z$other[[1]][,i]
+   colnames(out)[(2*(i-1)+1)] = colnames(z$E)[i]
+   colnames(out)[(2*(i-1)+2)] = "Detection Pval"
+ }
> rownames(out) = rownames(z$E)
> head(out[,1:8])

```

|              | 5445316054_A | Detection | Pval | 5445316054_B | Detection  | Pval |
|--------------|--------------|-----------|------|--------------|------------|------|
| ILMN_1762337 | 5.347191     | 0.2272727 |      | 5.430834     | 0.16753250 |      |
| ILMN_2055271 | 5.349342     | 0.2259740 |      | 5.940997     | 0.01688312 |      |
| ILMN_1736007 | 5.567351     | 0.1155844 |      | 5.317307     | 0.26623380 |      |
| ILMN_2383229 | 5.065763     | 0.5051948 |      | 4.978239     | 0.71818180 |      |
| ILMN_1806310 | 5.178655     | 0.3779221 |      | 5.815979     | 0.02467532 |      |

| ILMN_ID      | 4.755641  | 0.8662338 | 4.763895     | 0.85584410     |
|--------------|-----------|-----------|--------------|----------------|
| ILMN_1779670 | 4.755641  | 0.8662338 | 4.763895     | 0.85584410     |
| 5445316054_C | Detection | Pval      | 5445316054_D | Detection Pval |
| ILMN_1762337 | 5.118083  | 0.4363636 | 5.155345     | 0.46363640     |
| ILMN_2055271 | 5.478488  | 0.2298701 | 5.911265     | 0.02597403     |
| ILMN_1736007 | 5.040926  | 0.5792208 | 5.431196     | 0.19220780     |
| ILMN_2383229 | 5.152320  | 0.4480520 | 5.525455     | 0.12857140     |
| ILMN_1806310 | 5.095255  | 0.4532467 | 5.155710     | 0.41428570     |
| ILMN_1779670 | 4.838303  | 0.8077922 | 4.778316     | 0.82727270     |

```
> #write.table(out, file="GEO_norm.txt", sep="\t", quote=F) #rerun w/x for raw
```

## 4.2 Venn Diagram

```
> a = vennCounts(cbind(CBPreg=cbp_efit$qv<0.1,
+ p300reg=p300_efit$qv<0.05, hormreg=hr_efit$qv<0.05))
> vennDiagram(a, names=c("CBP reg", "p300 reg", "DHT reg"))
> #figure 1c is based on this, figure in paper is generated using Vennerable library
> # properly weighted venn digram looked terrible due to low number of CBP regulated genes
```

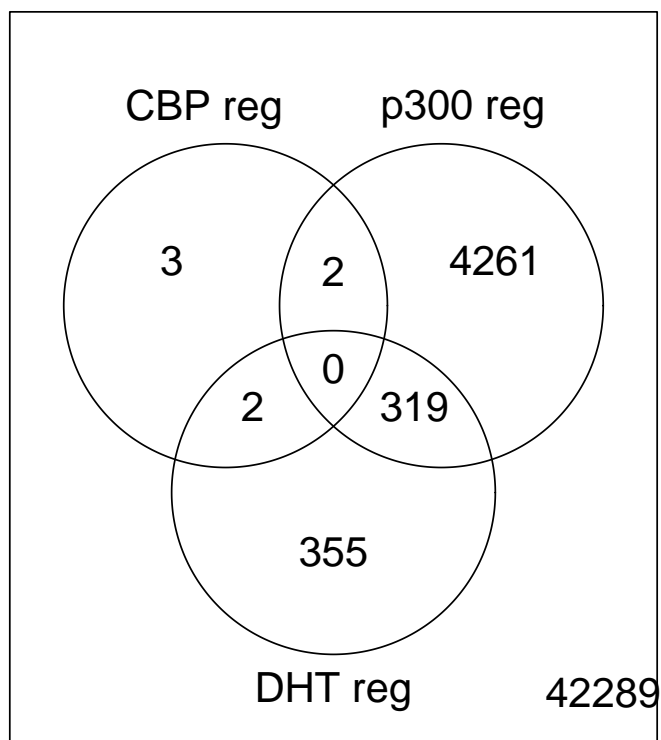

## 5 Other

### 5.1 Targets file

```
> read.table("sample description.txt", header=T, row.names=1) #targets file
```

|              | treatments | hour | batch    |
|--------------|------------|------|----------|
| 5445316054_A | siNS       | 0h   | 8.25.10A |
| 5445316054_B | sip300     | 0h   | 8.25.10B |
| 5445316054_C | siNS       | 0h   | 8.20.10  |
| 5445316054_D | siCBP      | 16h  | 8.25.10B |
| 5445316054_E | siCBP      | 0h   | 8.18.10  |
| 5445316054_F | siNS       | 16h  | 8.25.10B |
| 5445316054_G | sip300     | 16h  | 8.25.10A |
| 5445316054_H | siNS       | 16h  | 8.18.10  |
| 5445316054_I | sip300     | 0h   | 8.20.10  |
| 5445316054_J | siCBP      | 16h  | 8.18.10  |
| 5445316054_K | siCBP      | 0h   | 8.25.10A |
| 5445316054_L | sip300     | 16h  | 8.18.10  |
| 5491021084_A | sip300     | 0h   | 8.25.10A |
| 5491021084_B | siCBP      | 16h  | 8.20.10  |
| 5491021084_C | sip300     | 16h  | 8.25.10B |
| 5491021084_D | siNS       | 16h  | 8.25.10A |
| 5491021084_E | sip300     | 16h  | 8.20.10  |
| 5491021084_F | siCBP      | 0h   | 8.25.10B |
| 5491021084_G | siCBP      | 16h  | 8.25.10A |
| 5491021084_H | siCBP      | 0h   | 8.20.10  |
| 5491021084_I | siNS       | 0h   | 8.18.10  |
| 5491021084_J | sip300     | 0h   | 8.18.10  |
| 5491021084_K | siNS       | 16h  | 8.20.10  |
| 5491021084_L | siNS       | 0h   | 8.25.10B |

### 5.2 R/bioconductor version

```
> sessionInfo()
```

```
R version 2.13.0 (2011-04-13)  
Platform: x86_64-pc-linux-gnu (64-bit)
```

```
locale:
```

```
[1] LC_CTYPE=en_US.UTF-8      LC_NUMERIC=C  
[3] LC_TIME=en_US.UTF-8      LC_COLLATE=en_US.UTF-8  
[5] LC_MONETARY=C            LC_MESSAGES=en_US.UTF-8  
[7] LC_PAPER=en_US.UTF-8     LC_NAME=C  
[9] LC_ADDRESS=C             LC_TELEPHONE=C  
[11] LC_MEASUREMENT=en_US.UTF-8 LC_IDENTIFICATION=C
```

```
attached base packages:
```

```
[1] stats      graphics  grDevices  utils      datasets  methods   base
```

```
other attached packages:
```

```
[1] qvalue_1.26.0 limma_3.8.2
```

```
loaded via a namespace (and not attached):
```

```
[1] tcltk_2.13.0
```

### 5.3 Modifications to Combat.R

Combat.R can be found here: <http://jlab.byu.edu/ComBat/Download.html>  
Header comments were removed before the diff command. These modifications were made so I did not have to write out and read in a file everytime I wanted to rerun Combat.R with different parameters. Function arguments were changed to allow for passing in matrix of expression values.

```
$ diff ComBat.R ComBat_mod.R
1c1,2
< ComBat <- function(expression_xls, sample_info_file, type='txt', write=T, covariates='all', par.prior=T, filter=F, skip=0, prior.plots=T){
---
> ComBat_mod <- function(expression_xls, sample_info_file, type='txt', write=T,
> covariates='all', par.prior=T, filter=F, skip=0, prior.plots=T){
4c5,6
< saminfo <- read.table(sample_info_file, header=T, sep='\t',comment.char='')
---
> saminfo = sample_info_file #alternate loading, not fully done yet
> #saminfo <- read.table(sample_info_file, header=T, sep='\t',comment.char='')
8,9c10,11
< if(type=='csv'){
< dat <- read.csv(expression_xls,header=T,as.is=T)
---
> #if(type=='csv'){
> # dat <- read.csv(expression_xls,header=T,as.is=T)
13c15
< colnames(dat)=scan(expression_xls,what='character',nlines=1,sep=',',quiet=T)[1:ncol(dat)]
---
> # colnames(dat)=scan(expression_xls,what='character',nlines=1,sep=',',quiet=T)[1:ncol(dat)]
15,20c17,23
< }
<     else{
< dat <- read.table(expression_xls,header=T,comment.char='',fill=T,sep='\t', as.is=T)
< dat <- dat[,trim.dat(dat)]
< colnames(dat)=scan(expression_xls,what='character',nlines=1,sep='\t',quiet=T)[1:ncol(dat)]
< }
---
> # }
> #else{
> # dat <- read.table(expression_xls,header=T,comment.char='',fill=T,sep='\t', as.is=T)
> # dat <- dat[,trim.dat(dat)]
> # colnames(dat)=scan(expression_xls,what='character',nlines=1,sep='\t',quiet=T)[1:ncol(dat)]
> # }
> dat = expression_xls
23,24c26,27
<     dat <- dat[,-c(1:skip)]
<     else{geneinfo=NULL}
---
>     dat <- dat[,-c(1:skip)]
> }else{geneinfo=NULL}
137c140
< output_file <- paste('Adjusted',expression_xls,'.xls',sep='_')
---
> output_file <- paste('Adjusted expression.xls',sep='_')
```
